# Supplementary material for: Handheld Devices for Food Authentication and Their Applications: A Review
Source: MDPI journal article supplement (doi:10.3390/foods10122901), 2021-11-23
Supplement: s1 [file s1]

## **Supplementary Materials**

### **Handheld Devices for Food Authentication and Their Applications: A Review**

Judith Müller-Maatsch, Saskia van Ruth

**Table S1.** Overview of commercially available, portable devices that may be applied for food authentication, their weights and volumes as presented in Figure 1. Courtesy to instrument suppliers' websites.

| <b>Technology</b>                | <b>Brand</b>     | <b>Type</b>   | <b>Weight<br/>[kg]</b> | <b>Volume<br/>[cm<sup>3</sup>]</b> |
|----------------------------------|------------------|---------------|------------------------|------------------------------------|
| Ultraviolet-visible spectroscopy | ASD              | FieldSpec     | 1.2                    | 2640                               |
| Ultraviolet-visible spectroscopy | ASD              | QualitySpec   | 2.5                    | 9300                               |
| Ultraviolet-visible spectroscopy | OceanOptics      | HR2000 4000   | 0.6                    | 702                                |
| Ultraviolet-visible spectroscopy | OceanOptics      | USB2000 4000  | 0.2                    | 194                                |
| Ultraviolet-visible spectroscopy | OceanOptics      | FLAME         | 0.3                    | 180                                |
| Ultraviolet-visible spectroscopy | OceanOptics      | JAZ           | 2.2                    | 16335                              |
|                                  |                  | QE65000 65    |                        |                                    |
| Ultraviolet-visible spectroscopy | OceanOptics      | pro           | 1.2                    | 1064                               |
| Ultraviolet-visible spectroscopy | FelixIns         | F 750         | 1.1                    | 1023                               |
| Ultraviolet-visible spectroscopy | Avantes          | AvaSpec       | 0.2                    | 129                                |
| Ultraviolet-visible spectroscopy | Avantes          | AvaSpecLIBS   | 0.2                    | 129                                |
|                                  | Andor Oxford     |               |                        |                                    |
| Ultraviolet-visible spectroscopy | Instruments      | Mechelle 5000 | 10.0                   | 22341                              |
| Ultraviolet-visible spectroscopy | Stratio          | Linksquare    | 0.1                    | 14                                 |
|                                  |                  | CM2002        |                        |                                    |
| Ultraviolet-visible spectroscopy | Minolta          | CR400         | 1.6                    | 3724                               |
|                                  | Variable         |               |                        |                                    |
| Ultraviolet-visible spectroscopy | Spectros         | ColorMuse     | <0.1                   | 75                                 |
| Fluorescence spectroscopy        | OceanOptics      | USB2000 4000  | 0.2                    | 194                                |
| Infrared spectroscopy            | Si-Ware          | Neospectra    | <0.1                   | 77                                 |
| Infrared spectroscopy            | Spectral Engines | NIRONE        | <0.1                   | 11                                 |
| Infrared spectroscopy            | Innospectra      | NIRS G1       | <0.1                   | 207                                |
| Infrared spectroscopy            | Consumerphysics  | Scio          | <0.1                   | 51                                 |
| Infrared spectroscopy            | Thermo Fisher    | TruDefender   | 1.3                    | 1163                               |
| Infrared spectroscopy            | Viavi            | MicroNIR 2200 | 0.1                    | 131                                |
| Infrared spectroscopy            | Viavi            | MicroNIR      | 0.1                    | 79                                 |
|                                  |                  | Enterprise    |                        |                                    |
| Infrared spectroscopy            | TellSpec         | Sensor        | 0.1                    | 244                                |
| Infrared spectroscopy            | ASD              | LabSpec 2500  | 12.0                   | 13647                              |
| Infrared spectroscopy            | OceanOptics      | NIRQuest      | 1.2                    | 941                                |
|                                  | Texas            |               |                        |                                    |
| Infrared spectroscopy            | Instruments      | DLPNIRScan    | 0.1                    | 129                                |
|                                  | Control          | NIR512L-      |                        |                                    |
| Infrared spectroscopy            | Development Inc  | 1.7T1         | 0.9                    | 1331                               |
| Infrared spectroscopy            | Agilent          | Exoscan FTIR  | 3.2                    | 4558                               |
|                                  |                  | 4500 ATR-     |                        |                                    |
| Infrared spectroscopy            | Agilent          | FTIR          | 6.8                    | 12122                              |
| Infrared spectroscopy            | Agilent          | Cary 630 FTIR | 3.6                    | 6000                               |
| Infrared spectroscopy            | FANTEC           | FQANIR GUN    | 2.8                    | 5000                               |
| Infrared spectroscopy            | Arcoptix         | FT-NIR        | 1.7                    | 2304                               |
| Infrared spectroscopy            | JMAanalytik      | TIDAS S700    | 8.0                    | 15758                              |
|                                  |                  | QE65000 65    |                        |                                    |
| Raman spectroscopy               | OceanOptics      | pro           | 1.2                    | 1064                               |

|                                      |                          |                               |      |       |
|--------------------------------------|--------------------------|-------------------------------|------|-------|
| Raman spectroscopy                   | SciAps                   | Inspector                     |      |       |
| Raman spectroscopy                   | Rigaku                   | Raman                         | 2.3  | 1326  |
| Raman spectroscopy                   | Rigaku                   | Progeny                       | 1.6  | 1792  |
| Raman spectroscopy                   | Rigaku                   | Xantus                        | 2.2  | 244   |
| Raman spectroscopy                   | Metrohm                  | Raman Sierra                  | 2.7  | 4690  |
|                                      |                          | HyperFlux                     |      |       |
| Raman spectroscopy                   | Tornado Spectral         | PRO Plus                      | 9.8  | 13819 |
| Raman spectroscopy                   | OptoTrace                | RamTracer                     | 3.0  | 3240  |
| Raman spectroscopy                   | Bruker                   | BRAVO                         | 1.5  | 2611  |
| Raman spectroscopy                   | Agilent                  | Resolve                       | 2.2  | 3281  |
| Laser induces breakdown spectroscopy | OceanOptics              | HR2000 4000                   | 0.6  | 702   |
| Laser induces breakdown spectroscopy | Avantes                  | AvaSpec                       | 0.2  | 129   |
| Laser induces breakdown spectroscopy | Andor Oxford Instruments | Mechelle 5000 Spectral camera | 10.0 | 22341 |
| Imaging                              | Specim                   | IQ Spectrograph               | 1.3  | 1414  |
| Imaging                              | Specim                   | ImSpector                     | 4.5  | 4550  |
| Imaging                              | Xenics                   | XEVA FPA                      | 1.3  | 1065  |
| Sensor arrays                        | Cyrano Sciences          | Cyranose 320                  | 0.9  | 1100  |
| Sensor arrays                        | Airsense                 | PEN3                          | 2.1  | 4457  |
| Sensor arrays                        | FoodSniffer              | FoodSniffer                   | 0.2  | 1080  |

**Table S2.** Applications of commercially available devices that may be applied for authentication of meat, meat products, and offal.

| <b>Food</b>               | <b>Targeted food component (if applicable)</b> | <b>Property (if applicable)</b>                       | <b>Technology</b> | <b>Wavelength range [nm]</b>  | <b>Device name</b>                                                                          | <b>Literature</b>               |
|---------------------------|------------------------------------------------|-------------------------------------------------------|-------------------|-------------------------------|---------------------------------------------------------------------------------------------|---------------------------------|
| Lamb carcasses            | -                                              | Feeding regime                                        | VIS               | 400-700                       | Minolta CM-2002, Konica Minolta, Chizoda, Tokio, Japan                                      | Dian et al., 2008 [62]          |
| Chicken                   | -                                              | Contamination                                         | VIS<br>NIR        | 400-900<br>900-1700           | EPP2000-CXR, StellarNet Inc., Tampa, FL, USA<br>EPP2000, StellarNet Inc., Tampa, FL, USA    | Chao et al., 2008 [157]         |
| Minced beef               | -                                              | Spoilage                                              | FLUO<br>VIS-NIR   | 307-460<br>346-600<br>410-705 | USB 2000 spectrofluorimeter, IDIL Fibres Optiques (Lannion, France)                         | Ait-Kaddour et al., 2011 [158]  |
| Live pigs, pork carcasses | Fatty acid profile                             | Feeding regimes                                       | VIS-NIR           | 350-2500                      | LabSpecPro A108310, ASD, Boulder, Colorado, USA                                             | Perez-Marin et al., 2009 [63]   |
| Pig subcutaneous fat      | Fatty acid profile, iodine value               | -                                                     | VIS-NIR           | 350-2500                      | LabSpec4, ASD, Boulder, CO, USA                                                             | Prieto et al., 2018 [64]        |
| Beef carcasses            | -                                              | pH, color traits, water holding capacity, shear force | VIS-NIR, NIR      | 350-1830<br>905-1649          | LabSpec2500, ASD, Boulder, CO, USA<br>MicroNIR Pro, Viavi Solutions, Santa Rosa, CA, USA    | Savoia et al., 2019 [159]       |
| Salted minced pork        | Fat and moisture content                       | -                                                     | NIR               | 740-1070<br>940-1700          | Scio, Consumer Physics, Tel Aviv, Israel<br>SpectralProbe, Polychromix, Wilmington, MA, USA | Kartakoullis et al., 2019 [160] |

|                |                                              |                                                                                  |     |                                   |                                                                                                                                                                             |                                |
|----------------|----------------------------------------------|----------------------------------------------------------------------------------|-----|-----------------------------------|-----------------------------------------------------------------------------------------------------------------------------------------------------------------------------|--------------------------------|
| Sausages       | -                                            | Superficial water activity (aw) and moisture content during fermentation process | NIR | 920-1800<br>1100-2300<br>830-2500 | SpectralProbe, Polychromix, Wilmington, MA, USA<br>Luminar 5030, Brimrose Corp. of America, Baltimore, USA<br>Matrix-F duplex FT-NIR, Bruker Optik GmbH, Ettlingen, Germany | Collell et al., 2012 [161]     |
| Pork muscles   | Crude protein, moisture content, fat content | -                                                                                | NIR | 1600-2400                         | Phazir 1624, Polychromix, Wilmington, MA, USA                                                                                                                               | Zamora-Rojas et al., 2012 [69] |
| Pork carcasses | -                                            | Feeding regime                                                                   | NIR | 1600-2400                         | Phazir 1624, Polychromix, Wilmington, MA, USA                                                                                                                               | Zamora-Rojas et al., 2012 [69] |
| Pork carcasses | -                                            | Shelf life (Colony forming units, pH)                                            | NIR | 1600-2400                         | Phazir, Polychromix, Wilmington, MA, USA                                                                                                                                    | Prado et al., 2011 [162]       |
| Pork carcasses | -                                            | Quality classification by breeding (DNA analysis), feeding regimes               | NIR | 1600-2400                         | MicroPhazir 1624, Polychromix, Wilmington, MA, USA                                                                                                                          | Horcada et al., 2020 [70]      |
| Veal sausages  | -                                            | Classification of species, Detection of adulteration with pork meat and fat      | NIR | 1600-2400                         | MicroPhazir GP4.0 ThermoFisher Scientific, MA, USA (former Polychromix)                                                                                                     | Schmutzler et al., 2015 [74]   |
| Pork           | -                                            | Freshness (Thiobarbituric acid reactive substances values)                       | NIR | 1100-2200                         | MicroNIR 2200, Viavi Solutions, San Jose, CA, USA                                                                                                                           | Kucha & Ngadi 2020 [163]       |
| Pork carcasses | -                                            | Premium classifications according to fatty acid composition                      | NIR | 900-1700                          | MicroNIR Onsite Lite, Viavi Solutions, Santa Rosa, CA, USA                                                                                                                  | Piotrowski et al., 2019 [68]   |

|                                 |             |                                                                                                         |       |                                              |                                                                                                                                                               |                                 |
|---------------------------------|-------------|---------------------------------------------------------------------------------------------------------|-------|----------------------------------------------|---------------------------------------------------------------------------------------------------------------------------------------------------------------|---------------------------------|
| Chicken breast fillet           | -           | Animal welfare classification, Non-organic/organic, feeding regimes, storage properties (frozen-thawed) | NIR   | 908-1676                                     | MicroNIR Pro, Viavi Solutions, Milipats, CA, USA                                                                                                              | Parastar et al., 2020 [71]      |
| Game muscles                    | -           | Classification of species                                                                               | NIR   | 908-1700                                     | MicroNIR OnSite, Viavi Solutions, San Jose, CA, USA                                                                                                           | Dumalisile et al., 2020 [73]    |
| Pork carcasses                  | -           | Premium classification according to fatty acid composition                                              | NIR   | 910-1676                                     | MicroNIR Pro1700, Viavi Solutions, San Jose, CA, USA                                                                                                          | Perez-Marin et al., 2021 [67]   |
| Pork, chicken, beef minced meat | -           | Classification of species, adulteration detection                                                       | NIR   | 908-1676                                     | MicroNIR Pro1700, Viavi Solutions, San Jose, CA, USA                                                                                                          | Silva et al., 2020 [75]         |
| Lamb                            | Fat content | Age when slaughtered                                                                                    | NIR   | 900-1700<br>350-2500<br>350-2500<br>350-2500 | NIRScan Nano, Texas instruments, Texas, USA<br>LabSpec4, ASD, Boulder, CO, USA<br>LabSpec5000, ASD, Boulder, CO, USA<br>FieldSpec Trek, ASD, Boulder, CO, USA | Dixit et al., 2020 [66]         |
| Chicken parts                   | -           | Discrimination of chicken parts                                                                         | NIR   | 900-1700                                     | NIRScan Nano, Texas instruments, Texas, USA                                                                                                                   | Nolasco Perez et al., 2018 [72] |
| Chicken breast fillets          | -           | Spoilage                                                                                                | Raman | 784-1135                                     | QE Pro-Raman spectrometer, Ocean Optics, the Netherlands                                                                                                      | Jaafreh et al., 2018 [164]      |

|             |   |                                         |         |         |                                                                                           |                                  |
|-------------|---|-----------------------------------------|---------|---------|-------------------------------------------------------------------------------------------|----------------------------------|
| Minced beef | - | Classification of species, adulteration | LIBS    | 300-900 | Aurora LIBS spectrometer<br>Applied Spectra, Fremont,<br>CA, USA                          | Bilge et al., 2016<br>[76]       |
| Minced beef | - | Substitution with offal                 | LIBS    | 185-904 | LIBSCAN 1500,<br>Applied Photonics Limited,<br>Skipton North Yorkshire,<br>United Kingdom | Casado-Gavaldà et al., 2017 [77] |
| Chicken     | - | Contamination of chicken                | Imaging | 430-900 | ImSpector V9,<br>Specim, Spectral Imaging,<br>Oulu, Finland                               | Liu et al., 2003<br>[165]        |

VIS = visible spectroscopy; FLUO = fluorescence spectroscopy; NIR = near-IR spectroscopy; MIR = mid-IR, Raman = raman spectroscopy; LIBS = laser induced breakdown spectroscopy; - = not applicable/available.

**Table S3.** Applications of commercially available devices that may be applied for authentication of milk and milk products.

| <b>Food</b>            | <b>Targeted food component (if applicable)</b> | <b>Property (if applicable)</b>                     | <b>Technology</b> | <b>Wavelength range [nm]</b>       | <b>Device name</b>                                                           | <b>Literature</b>            |
|------------------------|------------------------------------------------|-----------------------------------------------------|-------------------|------------------------------------|------------------------------------------------------------------------------|------------------------------|
| Cheese                 | -                                              | Feeding regimes                                     | VIS               | 400-700                            | Minolta CM-2002, Konica Minolta, Chizoda, Tokio, Japan                       | Andueza et al., 2013 [78]    |
| Cheese                 | Fat, dry matter, pH, total and soluble protein | -                                                   | FLUO              | 307-460<br>346-600<br>410-705      | Spectrometer, Idil Fibres Optiques, Lannion, France                          | Karoui & Dufour 2008 [166]   |
| Milk                   | Fat, protein content                           | -                                                   | VIS-NIR           | 400-995                            | Tidas S 700, J &M Analytik AG, Essingen, Germany                             | Bogomolov et al., 2017 [80]  |
| Milk powder            | -                                              | Treatment with gamma irradiation                    | VIS-NIR           | 325-1075                           | FieldSpec ASD, Boulder, CO, USA                                              | Kong et al., 2013 [86]       |
| Milk                   | Fat, protein content, lactose                  | -                                                   | NIR               | 1100-1400<br>1700-200<br>2200-2500 | Nirone 1.4, Nirone 2.0, Nirone 2.5, Spectral Engines Oy, Helsinki, Finland   | Uusitalo et al., 2019 [79]   |
| Cheddar cheese         | Total protein content                          | Ripening stage/ proteolysis (intact casein content) | NIR               | 740-1070                           | Scio, Consumer Physics, Tel Aviv, Israel                                     | Ma et al., 2019 [82]         |
| Cheese (various types) | Fat and moisture content                       | -                                                   | NIR               | 740-1070                           | Scio, Consumer Physics, Tel Aviv, Israel                                     | Wiedemair et al., 2019 [167] |
| Milk                   | Protein, fat and carbohydrate content          | -                                                   | NIR               | 740-1070<br>1350-2558              | Scio, Consumer Physics, Tel Aviv, Israel<br>Neospectra Si-Ware, Cairo, Egypt | Riu et al., 2020 [168]       |



|                     |                                   |                                   |       |            |                                                                                               |                                 |
|---------------------|-----------------------------------|-----------------------------------|-------|------------|-----------------------------------------------------------------------------------------------|---------------------------------|
| Retail milk         | -                                 | Organic/non-organic dairy farming | NIR   |            | Micro-NIR 1700, Viavi Solutions, San Jose, CA, USA                                            | Liu et al., 2018 [83]           |
| UHT milk            | -                                 | Regular/lactose-free milk         | NIR   | 908-1676   | Micro-NIR 1700, Viavi Solutions, San Jose, CA, USA                                            | de Lima et al., 2018 [81]       |
| Milk powder         | -                                 | Adulteration                      | NIR   |            | Phazir Thermo Fisher Scientific, Waltham, MA, USA (former Polychromix)                        | Karunathilaka et al., 2018 [85] |
| Freeze-dried milk   | -                                 | Geographical origin               | NIR   | 200-2600   | Arcoptix FTIR-NIR Arcoptix, Neuchatel, Switzerland                                            | Behkami et al., 2019 [84]       |
| Milk powder         | -                                 | Adulteration                      | MIR   | 15385-2500 | Agilent 4500 portable ATR-FTIR spectrometer, Agilent Technologies, Inc., Santa Clara, CA, USA | Limm et al., 2018 [23]          |
| Milk                | Protein, fat carbohydrate content | Qualitative prediction of lactose | MIR   | 2500-16667 | ATR-FT-MIR 4100 Exoscan, Agilent Technologies, Inc., Santa Clara, CA, USA                     | Gorla et al., 2020 [25]         |
| Milk powder         | -                                 | Adulteration                      | Raman | 5000-50000 | Inspector RamanTM 1.3, DeltaNu Inc., Laramie, WY, USA                                         | Cheng et al., 2010 [87]         |
| Milk powder         | -                                 | Adulteration                      | LIBS  | 540-900    | HR 4000 , Oceanoptics, Dunedin, FL, USA                                                       | Bilge et al., 2016 [90]         |
| Milk (freeze-dried) | -                                 | Species detection, Adulteration   | LIBS  | 190-450    | AvaSpec, Avantes, Apeldoorn, the Netherlands                                                  | Moncayo et al., 2017 [89]       |

|        |   |                   |      |         |                                                 |                             |
|--------|---|-------------------|------|---------|-------------------------------------------------|-----------------------------|
| Milk   | - | Species detection | LIBS | 186-900 | Aurora,<br>Applied Spectra, Fremont,<br>CA, USA | Bilge et al., 2016<br>[76]  |
| Butter | - | Adulteration      | LIBS | 186-900 | Aurora,<br>Applied Spectra, Fremont,<br>CA, USA | Temiz et al.,<br>2018 [169] |

VIS = visible spectroscopy; FLUO = fluorescence spectroscopy; NIR = near-IR spectroscopy; MIR = mid-IR; (ATR)-FTIR = (attenuated total reflectance) Fourier transform IR; Raman = raman spectroscopy; LIBS = laser induced breakdown spectroscopy; - = not applicable/available.

**Table S4.** Applications of commercially available devices that may be applied for authentication of fish and seafood.

| <b>Food</b>              | <b>Targeted food component (if applicable)</b> | <b>Property (if applicable)</b> | <b>Technology</b> | <b>Wavelength range [nm]</b> | <b>Device name</b>                                                                                           | <b>Literature</b>           |
|--------------------------|------------------------------------------------|---------------------------------|-------------------|------------------------------|--------------------------------------------------------------------------------------------------------------|-----------------------------|
| Fish fillets and patties | -                                              | Species detection               | NIR               | 950-1650                     | MicroNIR OnSite, Viavi Solutions, Santa Rosa, CA, USA                                                        | Grassi et al., 2018 [91]    |
| Fish fillets and patties | -                                              | Species detection               | NIR               | 887-1667                     | MicroNIR 1700, Viavi Solutions, Santa Rosa, CA, USA                                                          | O'Brien et al., 2013 [92]   |
| Frozen whole fish        | Fat content                                    | -                               | NIR               | 600-1000                     | FT 20, Fantec Research Institute, Kosai, Japan                                                               | Shimamoto 2003 [170]        |
| Fish fillets             | Moisture content                               | -                               | Imaging           | 400-100<br>897-1753          | Specim V10E, Spectral Imaging Ltd., Oulu, Finland<br>ImSpector N17E, Specim, Spectral Imaging, Oulu, Finland | He et al., 2013 [93]        |
| Fish fillets             | -                                              | Freshness                       | Imaging           | 897-1753                     | ImSpector N17E, Specim, Spectral Imaging, Oulu, Finland                                                      | He et al., 2013 [93]        |
| Shrimp                   | -                                              | Freshness                       | Imaging           | 380-1028                     | ImSpector V10, Specim, Spectral Imaging, Oulu, Finland                                                       | Yu et al., 2018 [171]       |
| Fish fillets             | -                                              | Freshness                       | Sensor array      |                              | PEN3, Airsense Analytics, Schwerin, Germany<br>FoodSniffer, Foodsniffer Redwood City, CA, USA                | Castrica et al., 2019 [172] |

NIR = near-IR spectroscopy; - = not applicable/available.

**Table S5.** Applications of commercially available devices that may be applied for authentication of products of animal origin other than presented in Tables 2-4.

| <b>Food</b> | <b>Targeted food component (if applicable)</b> | <b>Property (if applicable)</b>                                               | <b>Technology</b> | <b>Wavelength range [nm]</b> | <b>Device name</b>                                        | <b>Literature</b>                         |
|-------------|------------------------------------------------|-------------------------------------------------------------------------------|-------------------|------------------------------|-----------------------------------------------------------|-------------------------------------------|
| Eggs        | -                                              | Freshness (Storage time)                                                      | NIR               | 740-1070                     | Scio, Consumer Physics, Tel Aviv, Israel                  | Coronel Reyes & Ramirez-Morales 2018 [94] |
| Honey       | -                                              | Nectar origin, geographical origin                                            | NIR               | 950-1630                     | TellSpec<br>Tellspec Inc.,<br>Toronto, Ontario,<br>Canada | Kaszab et al., 2017 [95]                  |
| Honey       | -                                              | Nectar origin, geographical origin                                            | LIBS              | 200-1000                     | AvaSpec,<br>Avantes,<br>Apeldoorn, the<br>Netherlands     | Stefas et al., 2020 [97]                  |
| Honey       | -                                              | Nectar origin, geographical origin, Detection of adulteration with rice sirup | LIBS              | 200-980                      | BRC115P-V,<br>B&WTEK,<br>Newark, USA                      | Lastra-Mejías et al., 2020 [96]           |

NIR = near-IR spectroscopy; LIBS = laser induced breakdown spectroscopy; - = not applicable/available.

**Table S6.** Applications of commercially available devices that may be applied for authentication of fresh and dried food products of plant origin

| <b>Food</b>                               | <b>Targeted food component (if applicable)</b> | <b>Property (if applicable)</b>                      | <b>Technology</b> | <b>Wavelength range [nm]</b> | <b>Device name</b>                                                                                               | <b>Literature</b>            |
|-------------------------------------------|------------------------------------------------|------------------------------------------------------|-------------------|------------------------------|------------------------------------------------------------------------------------------------------------------|------------------------------|
| Tomato                                    | Carotenoid content                             | Freshness/ Storage days                              | VIS<br>Raman      | -                            | CR-400,<br>Konica Minolta,<br>Chizoda, Tokio, Japan<br>QE Pro-Raman spectrometer, Ocean Optics, Dunedin, FL, USA | Fu et al., 2016 [173]        |
| Apples                                    | -                                              | Classification of variety, organic vs non-organic    | VIS               | -                            | SPARKS, Ocean Optics, Dunedin, FL, USA                                                                           | Vincent et al., 2018 [98]    |
| Tea                                       | -                                              | Classification                                       | FLUO              | -                            | USB 2000, Ocean Optics, Dunedin, FL, USA                                                                         | Dong et al., 2014 [99]       |
| Maize kernels                             | -                                              | Contamination with mycotoxins                        | FLUO              | -                            | AvaSpec 2048, Avantes, Apeldoorn, the Netherlands                                                                | Smeesters et al., 2015 [174] |
| Food powders (plant and non-plant origin) | -                                              | Classification                                       | VIS-NIR           | 450–1000                     | Linksquare, Avantes, the Netherlands                                                                             | You et al., 2017 [100]       |
| Whole melons                              | Color, total soluble solids                    | Ripeness (based on the ration of the edible portion) | VIS-NIR           |                              | QE Pro-spectrometer, Ocean Optics, the Netherlands                                                               | Wang et al., 2014 [44]       |
| Intact oranges                            | Soluble solids content                         | Ripeness                                             | VIS-NIR           | 360-2000                     | QE Pro-spectrometer, Ocean Optics, the Netherlands                                                               | Wang et al., 2014 [44]       |
| Banana fruit pulp                         | Carotenoid content                             | -                                                    | VIS-NIR           |                              | LabSpec2500, ASD, Boulder, CO, USA                                                                               | Davey et al., 2009 [102]     |

|                     |                                                         |                              |         |           |                                                    |                                                                    |
|---------------------|---------------------------------------------------------|------------------------------|---------|-----------|----------------------------------------------------|--------------------------------------------------------------------|
| Cassava roots       | Dry matter content, carotenoid content                  | -                            | VIS-NIR |           | QualitySpec, ASD, Boulder, Colorado, USA           | Ikeogu et al., 2017 [103]                                          |
| Turmeric powder     | -                                                       | Detection of adulteration    | VIS-NIR | 780-2500  | QualitySpec, ASD, Boulder, Colorado, USA           | Rukundo & Danao 2020 [106]                                         |
| Sugarcane pieces    | Soluble solids content, fiber content, moisture content | Sample type, quality classes | VIS-NIR | 325-1075  | Fieldspec, ASD, Boulder, CO, USA                   | Mat Nawi et al., 2013 [107]; Mat Nawi et al., 2013 [175]           |
| Tomato puree        | Soluble solids content, antioxidant components          | -                            | VIS-NIR | 500-1000  | Fieldspec, ASD, Boulder, CO, USA                   | Szuwandzies et al., 2014 [104]                                     |
| Intact mango        | Soluble solid content                                   | Fruit quality                | VIS-NIR | 600-1000  | FT 20, Fantec Research Institute, Kosai, Japan     | Saranwong et al., 2003 [176]                                       |
| Intact mango        | Dry matter, soluble solids content, firmness            | Maturity, fruit quality      | VIS-NIR | 310-11400 | F 750, Felix instruments, Washington, USA          | Santos Neto et al., 2018 [177], dos Santos Neto et al., 2017 [178] |
| Unripe banana flour | -                                                       | Adulteration                 | VIS-NIR | 447–1005  | F 750, Felix instruments, Washington, USA          | Ndlovu et al., 2019 [105]                                          |
| Cherry              | Dry matter                                              | Fruit quality                | VIS-NIR | 285–1200  | F 750, Felix instruments, Washington, USA          | Toivonen et al., 2017 [101]                                        |
| Intact orange       | Soluble solids content                                  | Fruit quality                | VIS-NIR | 600-1100  | NIRmagic, Beijing Weichuangyintu Technology, China | Li et al., 2020 [179]                                              |

|                                                                         |                                                                                                                                         |                         |                |                                           |                                                                                                                                            |                                 |
|-------------------------------------------------------------------------|-----------------------------------------------------------------------------------------------------------------------------------------|-------------------------|----------------|-------------------------------------------|--------------------------------------------------------------------------------------------------------------------------------------------|---------------------------------|
| Intact and pressed grapes, blueberries                                  | Soluble solids content, titratable acidity, pH, polyphenol content, anthocyanin content                                                 | Fruit quality/ripeness  | VIS-NIR        | 450-980                                   | AvaSpec 2048, Avantes, Apeldoorn, the Netherlands                                                                                          | Guidetti et al., 2010 [110]     |
| Sugarcane                                                               | Mineral content                                                                                                                         | Fruit quality           | VIS-NIR        | 350-1000                                  | JAZ-EL350, Ocean Optics, Dunedin, FL, USA                                                                                                  | Steidle Neto et al., 2017 [108] |
| Apples                                                                  | Total soluble solids (Brix), titratable acids, firmness, phenols, anthocyanins, flavonoids, chlorophyll, carotenoids, ascorbate (Vit C) | Nutritional value       | VIS-NIR        | 450-980                                   | AvaSpec 2048, Avantes, Apeldoorn, the Netherlands                                                                                          | Beghi et al., 2012 [180]        |
| Intact oranges                                                          | Soluble solids content, acidity (pH), titratable acids, firmness, juice volume, fruit weight, rind weight                               | Maturity                | VIS-NIR<br>NIR | 350–1000<br>1100–2300                     | LabSpec2500, ASD, Boulder, CO, USA<br>Luminar 5030, Brimrose Corp. of America, Baltimore, USA                                              | Cayuela & Weiland 2010 [181]    |
| Fresh fruits (kiwifruits, feijoa fruit, avocado, apples)                | Dry matter, total soluble solids, firmness, titratable acids, color                                                                     | Fruit quality, maturity | NIR            | 740-950                                   | Scio, Consumer Physics, Tel Aviv, Israel                                                                                                   | Li et al., 2018 [182]           |
| Fresh fruits (kiwifruits, apples, apricots, nectarines, peaches, plums) | Dry matter content                                                                                                                      | -                       | NIR            | 740-950<br>740-950<br>650-950<br>600-1000 | Scio, Consumer Physics, Tel Aviv, Israel<br>H100C, Sunforest, Incheon, Korea<br>Nirvana, Integrated Spectronics, Baulkham Hills, Australia | Kaur et al., 2017 [183]         |

|                  |                                           |                                                   |     |                                   |                                                                                                                                                   |                               |
|------------------|-------------------------------------------|---------------------------------------------------|-----|-----------------------------------|---------------------------------------------------------------------------------------------------------------------------------------------------|-------------------------------|
|                  |                                           |                                                   |     |                                   | F 750, Felix instruments, Washington, USA                                                                                                         |                               |
| Rice             | -                                         | Authenticity, quality grades, geographical origin | NIR | 740-950                           | Scio, Consumer Physics, Tel Aviv, Israel                                                                                                          | Teye et al., 2019 [127]       |
| Buckwheat grains | Antioxidant capacity                      | Quality                                           | NIR | 740-950<br>1596-2396<br>8865-4627 | Scio, Consumer Physics, Tel Aviv, Israel<br>MicroPhazir RX, Polychromix, Wilmington, MA, USA<br>MicroNIR 2200, Viavi Solutions, San Jose, CA, USA | Wiedemair & Huck 2018 [184]   |
| Oregano          | -                                         | Detection of adulteration                         | NIR | 1350–2500                         | Neospectra, SI-ware, Heliopolis, Egypt                                                                                                            | McVey et al., 2021 [120]      |
| Tea leaves       | Catechin content, caffeine content        | Quality                                           | NIR | 900-1700                          | NIR-S-R2, InnoSpectra, Taiwan                                                                                                                     | Wang et al., 2020 [111]       |
| Olive fruits     | Oil content, genotype                     | Fruit quality, ripeness                           | NIR | 1100 - 2300                       | Luminar 5030, Brimrose, Baltimore, USA                                                                                                            | León & Gracia 2011 [185]      |
| Olive fruits     | Water content, fat content, free acidity  | Fruit quality, ripeness                           | NIR | 1100–2300                         | Luminar 5030, Brimrose, Baltimore, USA                                                                                                            | Fernandez-Espinosa 2016 [186] |
| Olive fruits     | Firmness, total chlorophyll, carotenoids, | Ripeness                                          | NIR | 1100–2300                         | Luminar 5030, Brimrose, Baltimore, USA                                                                                                            | Cirilli et al., 2016 [187]    |



|                  |                                                                                                                                                                |                                                   |     |                                    |                                                                                                                                                                             |                               |
|------------------|----------------------------------------------------------------------------------------------------------------------------------------------------------------|---------------------------------------------------|-----|------------------------------------|-----------------------------------------------------------------------------------------------------------------------------------------------------------------------------|-------------------------------|
|                  | anthocyanins,<br>polyphenols                                                                                                                                   |                                                   |     |                                    |                                                                                                                                                                             |                               |
| Olive leaves     | Nitrogen content                                                                                                                                               | -                                                 | NIR | 1100-2500<br>1100-1700<br>450-1000 | Luminar 5030,<br>Brimrose, Baltimore,<br>USA<br>LIGA mini<br>spectrometer,<br>Boehringer-Ingelheim,<br>Ingelheim, Germany<br>USB 2000, Ocean<br>Optics, Dunedin, FL,<br>USA | Rotbart et al.,<br>2013 [125] |
| Soy              | -                                                                                                                                                              | Adulteration with<br>melamine                     | NIR | 1600-2399                          | MicroPhazir,<br>ThermoFisher<br>Scientific, Dublin,<br>Ireland                                                                                                              | Haughey et al.,<br>2015 [121] |
| Bell peppers     | Dry matter, soluble<br>solids content                                                                                                                          | Growing systems<br>(outdoor versus<br>greenhouse) | NIR | 1600-2400                          | MicroPhazir,<br>Polychromix,<br>Wilmington, MA,<br>USA                                                                                                                      | Sanchez et al.,<br>2019 [122] |
| Intact mandarins | Fruit weight, axial and<br>equatorial diameter,<br>color, firmness, pericarp<br>thickness, soluble solids<br>content, pH, titratable<br>acidity, juice content | Maturity                                          | NIR | 1600 - 2400                        | Phazir 2400,<br>Polychromix,<br>Wilmington, MA,<br>USA                                                                                                                      | Sánchez et al.,<br>2013 [188] |
| Avocado          | Moisture content, dry<br>matter                                                                                                                                | Maturity                                          | NIR | 940–1798                           | Phazir 1018,<br>Polychromix,<br>Wilmington, MA,<br>USA                                                                                                                      | Blakey 2016<br>[189]          |

|                     |                                                                                                |                              |     |             |                                                            |                                   |
|---------------------|------------------------------------------------------------------------------------------------|------------------------------|-----|-------------|------------------------------------------------------------|-----------------------------------|
| Intact nectarines   | Fruit weight, diameter, soluble solid content, firmness                                        | -                            | NIR | 1600–2400   | Phazir 2400, Polychromix, Wilmington, MA, USA              | Sánchez et al., 2011 [190]        |
| Intact strawberries | Firmness, soluble solid content, pH, titratable acidity                                        | Fruit quality                | NIR | 1600 - 2400 | Phazir 2400, Polychromix, Wilmington, MA, USA              | Sánchez et al., 2012 [191]        |
| Mandarins, Oranges  | Fruit weight, equatorial and axial diameter, color, firmness, pericarp thickness, juice weight | -                            | NIR | 1600- 2400  | Phazir 2400, Polychromix, Wilmington, MA, USA              | Torres et al., 2017 [192]         |
| Spinach             | Nitrate content, ascorbic acid content, soluble solid content                                  | -                            | NIR | 1600- 2400  | Phazir 2400, Polychromix, Wilmington, MA, USA              | Perez-Marín et al., 2019 [126]    |
| Beans               | protein content, starch content, amylose                                                       | -                            | NIR | 1596-2396   | MicroPhazir RX, Polychromix, Wilmington, MA, USA           | Plans et al., 2013 [112]          |
| Plums               | Firmness, soluble solids content                                                               | Fruit quality, ripeness      | NIR | 1600- 2400  | Phazir 2400, Polychromix, Wilmington, MA, USA              | Pérez-Marín et al., 2010 [113]    |
| Grapes              | Polyphenol content                                                                             | Fruit quality classification | NIR | 908 - 1676  | MicroNIR Pro Lite 1700, Viavi Solutions, San Jose, CA, USA | Baca-Bocanegra et al., 2019 [193] |
| Coffee beans        | -                                                                                              | Adulteration                 | NIR | 908-1676    | MicroNIR Pro1700, Viavi Solutions, San Jose, CA, USA       | Correia et al., 2018 [117]        |

|                     |                                                                                                  |                                                 |     |                        |                                                                                                     |                                |
|---------------------|--------------------------------------------------------------------------------------------------|-------------------------------------------------|-----|------------------------|-----------------------------------------------------------------------------------------------------|--------------------------------|
| Mango               | Soluble solids content, dry matter, titratable acidity, pulp firmness, soluble solids            | Fruit quality                                   | NIR | 950–1650               | MicroNIR Pro1700, Viavi Solutions, San Jose, CA, USA                                                | Marques et al., 2016 [194]     |
| Peanuts             | Fatty acid analysis                                                                              | Quality classification                          | NIR | 908–1676               | MicroNIR Pro1700, Viavi Solutions, San Jose, CA, USA                                                | Yu et al., 2020 [115]          |
| Tomatoes            | Fresh weight, pH, dry matter, chromatic values, electrical conductivity, titratable acidity, SSC | -                                               | NIR | 908-1650               | MicroNIR Pro1700, Viavi Solutions, San Jose, CA, USA                                                | Castrignanò et al., 2019 [123] |
| Paprika powder      | -                                                                                                | Adulteration with colorant and bulk adulterants | NIR | 900–1700               | DLPR NIRscan™ Nano, Texas instruments, Texas, USA                                                   | Oliveira et al., 2020 [118]    |
| Mulberries, Fengdou | Dry matter, soluble solids content, polyphenol content, flavonoid content                        | Fruit quality, Discrimination of varieties      | NIR | 908 - 1676<br>909–1649 | NIRScan Nano, Texas instruments, Texas, USA<br>MicroNIR Pro1700, Viavi Solutions, San Jose, CA, USA | Yan et al., 2019 [116]         |
| Intact mandarins    | Total acids, soluble solids content                                                              | -                                               | NIR | 350–1040               | USB 4000, Ocean optics, Dunedin, FL, USA                                                            | Liu et al., 2010 [195]         |
| Cucumbers           | -                                                                                                | Farming regime classification, pesticide usage  | NIR | 450–1000               | USB 2000, Ocean optics, Dunedin, FL, USA                                                            | Jamshidi et al., 2016 [109]    |
| Intact oranges      | Soluble solids content, titratable acids                                                         | Fruit quality, maturity                         | NIR | 200-1100               | USB 4000, Ocean optics, Dunedin, FL, USA                                                            | Liu et al., 2010 [195]         |

|                 |                                                                          |                                           |             |                                |                                                                                                  |                                                                        |
|-----------------|--------------------------------------------------------------------------|-------------------------------------------|-------------|--------------------------------|--------------------------------------------------------------------------------------------------|------------------------------------------------------------------------|
| Snake fruit     | Soluble solids content                                                   | -                                         | NIR         | 300-1040                       | USB 4000, Ocean optics, Dunedin, FL, USA                                                         | Suhandy et al., 2010 [196]                                             |
| Apple           | Soluble solids content, firmness                                         | -                                         | NIR         | 900-1700                       | NIRQuest512, Ocean optics, Dunedin, FL, USA                                                      | Zhu & Tian 2018 [128]                                                  |
| Apple           | -                                                                        | Classification in organic and non-organic | NIR         | 901-1721                       | NIRQuest512, Ocean optics, Dunedin, FL, USA                                                      | Song et al., 2016 [124]                                                |
| Watermelon      | Soluble solid content                                                    | Fruit quality, maturity grades            | NIR         | 680–950                        | FLAME, Ocean Optics, Dunedin, FL, USA                                                            | Jie et al., 2013 [197]; Jie et al., 2014 [198]; Jie et al., 2019 [199] |
| Lambs lettuce   | -                                                                        | Freshness/Decay                           | NIR         | 400-1000                       | JAZ, Ocean Optics, Dunedin, FL, USA                                                              | Beghi et al., 2014 [200]                                               |
| Sugar beet      | Mechanical properties, soluble solids content, moisture, sucrose content | Fruit quality                             | NIR         | 400–1100<br>900–1600           | LOE-USB, tec5USA, Plainview, NY, USA<br>NIR 512L-1.7T1, Control Development, South Bend, IN, USA | Pan et al., 2015 [114]                                                 |
| Tomatoes        | Soluble solids content (Brix), pH                                        | Fruit maturity                            | NIR         | 400-1100<br>900-1683           | LOE-USB, tec5USA, Plainview, NY, USA<br>NIR 512L-1.7T1, Control Development, South Bend, IN, USA | Huang et al., 2018 [201]                                               |
| Turmeric powder | -                                                                        | Adulteration with synthetic colorant      | NIR         | 900-1700                       | Dwarf Star, StellarNet Inc., Tampa, FL, USA                                                      | Kar et al., 2017 [119]                                                 |
| Peppercorn      | Moisture and phenolic content, antioxidant capacity                      | -                                         | NIR Imaging | 1350-1650<br>400-1000/880-1720 | NIROne, Spectral Engines Oy, Finland<br>Spectrograph, Spectral Imaging, Oulu, finland            | Esquerre et al., 2020 [202]                                            |

|              |   |                                               |         |            |                                                                             |                                    |
|--------------|---|-----------------------------------------------|---------|------------|-----------------------------------------------------------------------------|------------------------------------|
| Hazelnut     | - | Cultivar and geographic origin discrimination | MIR     | 15385-2500 | Exoscan FTIR, Agilent Technologies, Santa Clara, CA, USA                    | Manfredi et al., 2018 [129]        |
| Olive fruits | - | Harvesting manner                             | Raman   | 3704-50000 | R3000, Ocean Optics, Dunedin, FL, USA                                       | Guzman et al., 2012 [130]          |
| Maize kernel | - | Nutrient content, variety classification      | Raman   | 5882-25000 | Resolve handheld Raman analyser, Agilent Technologies, Santa Clara, CA, USA | Krimmer et al., 2019 [131]         |
| Stevia       | - | Counterfeit detection                         | Raman   | 5555-25000 | Progeny, Rigaku Raman Technologies, Wilmington, MA, USA                     | Vargas Jentzsch et al. 2016 [132]  |
| Brown rice   | - | Geographical origin                           | LIBS    | 200-630    | HR 4000+ , Oceanoptics, Dunedin, FL, USA                                    | Perez-Rodriguez et al., 2019 [133] |
| Rice         | - | Geographical origin                           | LIBS    | 200-950    | Mechelle 5000, Oxford Instruments, Tubney Woods, Abingdon, UK               | Yang et al., 2018 [134]            |
| Coffee       | - | Adulteration                                  | LIBS    | 186-900    | Aurora LIBS spectrometer Applied Spectra, Fremont, CA, USA                  | Sezer et al., 2018 [135]           |
| Nutmeg       | - | Adulteration                                  | Imaging | 400-1000   | Specim IQ camera, Specim, Spectral Imaging Ltd., Oulu, Finland              | Kiani et al., 2019 [203]           |
| Wheat flour  | - | Adulteration, Discrimination of               | Imaging | 900-1700   | ImSpector N17E,                                                             | Su & Sun 2017 [136]                |

|        |   |                         |              |         |                                                              |                             |
|--------|---|-------------------------|--------------|---------|--------------------------------------------------------------|-----------------------------|
|        |   | organic and non-organic |              |         | Specim, Spectral Imaging Ltd., Oulu, Finland                 |                             |
| Citrus | - | Canker detection        | Imaging      | 400-900 | ImSpector V10E, Specim, Spectral Imaging Ltd., Oulu, Finland | Qin et al., 2008 [204]      |
| Apple  | - | Maturity                | Sensor array | -       | Cyranose 320, Cyrano Sciences, Pasadena, CA, USA             | Pathange et al., 2006 [205] |

VIS = visible spectroscopy; FLUO = fluorescence spectroscopy; NIR = near-IR spectroscopy; MIR = mid-IR (MIR), Raman = raman spectroscopy; LIBS = laser induced breakdown spectroscopy; - = not applicable/available.

**Table S7.** Applications of commercially available devices that may be applied for authentication of processed food products of plant origin.

| <b>Food</b>         | <b>Targeted food component (if applicable)</b>                                    | <b>Property (if applicable)</b> | <b>Technology</b> | <b>Wavelength range [nm]</b> | <b>Device name</b>                                             | <b>Literature</b>                |
|---------------------|-----------------------------------------------------------------------------------|---------------------------------|-------------------|------------------------------|----------------------------------------------------------------|----------------------------------|
| Sugar syrups        | Glucose, fructose, sucrose content                                                | -                               | NIR               | 1596-2400                    | MicroPhazir GP 4.0, Thermo Fisher Scientific, Waltham, MA, USA | Henn et al., 2016 [137]          |
| Tabletop sweeteners | -                                                                                 | Adulteration                    | NIR               | 1596-2400                    | Phazir, Thermo Fisher Scientific, Waltham, MA, USA             | Karunathilaka et al., 2017 [139] |
| Palm oil            | -                                                                                 | Adulteration                    | NIR               | 908-1650                     | MicroNIR, Viavi solutions, San Jose, CA, USA                   | Basri et al., 2017 [140]         |
| Olive oil           | Fatty acid composition, chlorophyll and carotenoid concentration, color, moisture | Classification of oils          | NIR               | 908-1676                     | NIR Pro 1700ES, JDSU, Milpitas, CA, USA                        | Yan et al., 2019 [142]           |
| Lime juice          |                                                                                   | Adulteration                    | NIR               | 900-1700                     | TellSpec, Telspec, Toronto, Canada                             | Jahani et al., 2020 [138]        |
| Peanut oil          | Acid value                                                                        | Classification of oils          | NIR               | 900-1700                     | NIRQuest, Oceanoptics, Dunedin, FL, USA                        | Yang et al., 2017 [143]          |
| Palm oil            | Free fatty acids concentration                                                    | Classification of oils          | NIR               | 900-1700                     | TIDA-00554 DLP, Texas Instruments, Dallas, TX, USA             | Kaufmann et al., 2019 [144]      |
| Palm oil            | -                                                                                 | Adulteration                    | NIR               | 900-1700                     | Visum Palm, Iris, Cornellà de Llobregat Spain                  | Teye et al., 2019 [141]          |
| Sunflower oil       | -                                                                                 | Contamination, adulteration     | NIR               | 833 - 2300                   | Matrix F Bruker, Ettlingen, Germany                            | Picouet et al., 2018 [145]       |
| Craft beer          | Soluble solids content, pH,                                                       | Discrimination of beers         | NIR               | 450-980                      | AvaSpec2048, Avantes, the Netherlands                          | Giovenzana et al., 2014 [146]    |

|                  |                                                          |                                                 |       |               |                                                             |                                      |
|------------------|----------------------------------------------------------|-------------------------------------------------|-------|---------------|-------------------------------------------------------------|--------------------------------------|
| Olive oil        | -                                                        | Adulteration, variety discrimination            | MIR   | 4000-650 cm-1 | TrueDefender, ThermoScientific, Wilmington, MA, USA         | Pan et al., 2018 [24]                |
| Vegetable oils   | Peroxide value, fatty acid composition, free fatty acids | Variety discrimination, oil quality (oxidation) | MIR   | 4000-650 cm-1 | TrueDefender, ThermoScientific, Wilmington, MA, USA         | Allendorf et al., 2011 [147]         |
| Sacha inchi oils | Peroxide value, fatty acid composition, free fatty acids | Variety discrimination, adulteration            | MIR   | 4000-700 cm-1 | TrueDefender, ThermoScientific, Wilmington, MA, USA         | Maurer et al., 2012 [148]            |
| Vegetable oils   | -                                                        | Variety classification                          | Raman | 5000-25000    | Xantus, Rigaku Raman Technologies, Wilmington, MA, USA      | Vargas Jentzsch & Ciobotă 2014 [152] |
| Olive oil        | -                                                        | Adulteration                                    | Raman | 4167-41667    | RamTracer, OptoTrace Technologies, Inc., Sunnyvale, CA, USA | Zou et al., 2009 [153]               |
| Red wine         | -                                                        | Geographical origin classification              | LIBS  | 200-1000      | EPP2000, StellarNet, Tampa, FL, USA                         | Moncayo et al., 2016 [150]           |
| Olive oil        | -                                                        | Geographical origin, adulteration               | LIBS  | 200-1100      | AvaSpec-2048-USB2, Avantes, the Netherlands                 | Bellou et al., 2020 [149]            |
| Red wine         | -                                                        | Geographical origin classification              | LIBS  | 230-850       | Mechelle, Oxford Instruments, Tubney Woods, Abingdon, UK    | Tian et al., 2017 [151]              |

NIR = near-IR spectroscopy; MIR = mid-IR (MIR), Raman = raman spectroscopy; LIBS = laser induced breakdown spectroscopy; - = not applicable/available.
